# Supplementary material for: The Adjuvants Polyphosphazene (PCEP) and a Combination of Curdlan Plus Leptin Promote a Th17-Type Immune Response to an Intramuscular Vaccine in Mice
Source: MDPI journal article supplement (doi:10.3390/vaccines9050507), 2021-05-14
Supplement: s1 [file s1]

Supplementary Figures:

**Supplementary Figure S1:**

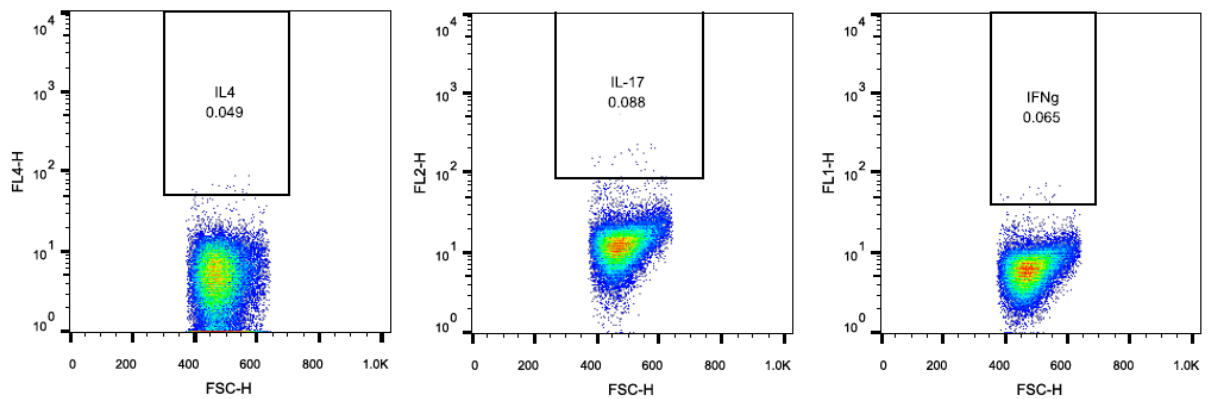

**Supplementary Figure 1: Representative flow cytometric analysis for splenocytes alone stained for IL-4, IFN $\gamma$  and IL-17.** Gating was set based on a cells-alone stain for each animal to ensure auto-fluorescence was not detected, additionally, isotype control stains and FMO stains were due to specific antibody binding of the anti-IL4 (right side), anti-IL-17 (center), and anti-IFN $\gamma$  (left side) antibodies. Antibodies were previously validated on mouse targets.

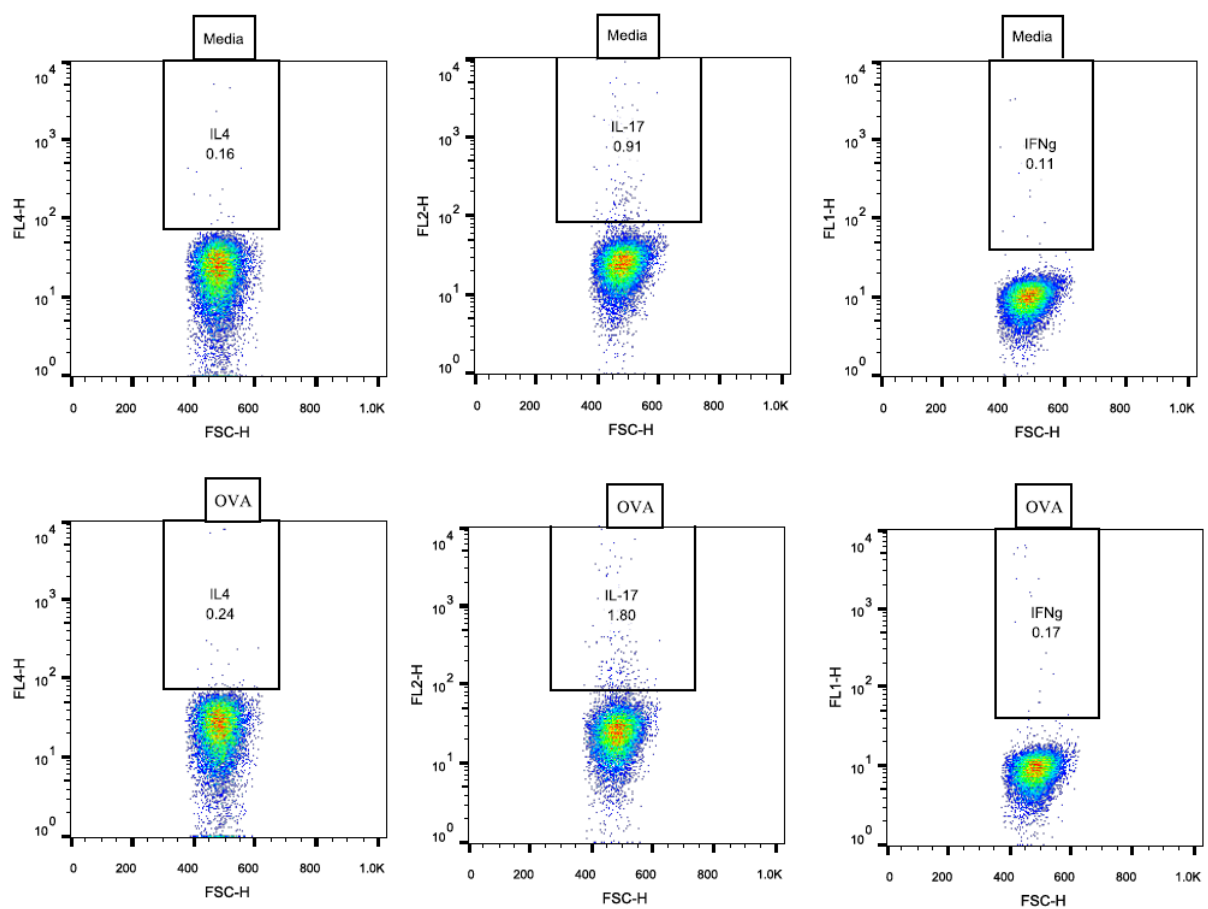

**Supplementary Figure S2: Representative flow cytometric analysis for splenocytes stimulated with OVA or mock-stimulated and stained for IL-4, IFN $\gamma$  and IL-17.** Gating was set based on a cells-alone stain for each animal to ensure auto-fluorescence was not detected, additionally, isotype control stains and FMO stains were carried out to ensure positive events were due to specific antibody binding of the anti-IL4 (right side), anti-IL-17 (center), and anti-IFN $\gamma$  (left side) antibodies. Antibodies were previously validated on mouse targets.
